# Supplementary material for: Molecular Typing of Mycoplasma genitalium-Positive Specimens Discriminates between Persistent and Recurrent Infections in Cases of Treatment Failure and Supports Contact Tracing
Source: MDPI journal article supplement (doi:10.3390/microorganisms7120609), 2019-11-23
Supplement: s1 [file s1]

| No. (%) of samples | No. of repeats | AAAAGGATC | ACT | ACT | ACT   | ACT   | ATT   | x x x | x x x | x x x | x x x | x x x | ACT | ATT | ACT | ATT | ACT | ATT | ACT | TGTATTTGA * |
|--------------------|----------------|-----------|-----|-----|-------|-------|-------|-------|-------|-------|-------|-------|-----|-----|-----|-----|-----|-----|-----|-------------|
| 5 (6,8)            | 9              | AAAAGGATC | ACT | ACT | x x x | x x x | x x x | x x x | x x x | x x x | x x x | x x x | ACT | ACT | ACT | ATT | ACT | ATT | ACT | TGTATTTGA   |
| 7 (9,5)            | 10a            | AAAAGGATC | ACT | ACT | ACT   | x x x | x x x | x x x | x x x | x x x | x x x | x x x | ACT | ACT | ACT | ATT | ACT | ATT | ACT | TGTATTTGA   |
| 1 (1,4)            | 10b            | AAAAGGATC | ACT | ACT | ACT   | x x x | x x x | x x x | x x x | x x x | x x x | x x x | ACT | ACT | ATT | ATT | ACT | ATT | ACT | TGTATTTGA   |
| 7 (9,5)            | 11a            | AAAAGGATC | ACT | ACT | ACT   | ACT   | x x x | x x x | x x x | x x x | x x x | x x x | ACT | ACT | ACT | ATT | ACT | ATT | ACT | TGTATTTGA   |
| 5 (6,8)            | 11b            | AAAAGGATC | ACT | ACT | ACT   | ACT   | x x x | x x x | x x x | x x x | x x x | x x x | ACT | ATT | ACT | ATT | ACT | ATT | ACT | TGTATTTGA   |
| 1 (1,4)            | 11c            | AAAAGGATC | ACT | ACT | ACT   | ACT   | x x x | x x x | x x x | x x x | x x x | x x x | ACT | ACT | ACT | ACT | ACT | ATT | ACT | TGTATTTGA   |
| 5 (6,8)            | 12a            | AAAAGGATC | ACT | ACT | ACT   | ACT   | ACT   | x x x | x x x | x x x | x x x | x x x | ACT | ACT | ACT | ATT | ACT | ATT | ACT | TGTATTTGA   |
| 2 (2,7)            | 12b            | AAAAGGATC | ACT | ACT | ATT   | ACT   | ATT   | x x x | x x x | x x x | x x x | x x x | ACT | ATT | ACT | ATT | ACT | ATT | ACT | TGTATTTGA   |
| 1 (1,4)            | 12c            | AAAAGGATC | ACT | ACT | ACT   | ACT   | ACT   | x x x | x x x | x x x | x x x | x x x | ACT | ATT | ACT | ATT | ACT | ATT | ACT | TGTATTTGA   |
| 3 (4,1)            | 13a            | AAAAGGATC | ACT | ACT | ACT   | ACT   | ACT   | ACT   | x x x | x x x | x x x | x x x | ACT | ACT | ACT | ATT | ACT | ATT | ACT | TGTATTTGA   |
| 2 (2,7)            | 13b            | AAAAGGATC | ACT | ACT | ACT   | ACT   | ACT   | ACT   | x x x | x x x | x x x | x x x | ACT | ATT | ACT | ATT | ACT | ATT | ACT | TGTATTTGA   |
| 3 (4,1)            | 14a            | AAAAGGATC | ACT | ACT | ACT   | ACT   | ACT   | ACT   | ACT   | x x x | x x x | x x x | ACT | ACT | ACT | ATT | ACT | ATT | ACT | TGTATTTGA   |
| 7 (9,5)            | 14b            | AAAAGGATC | ACT | ACT | ACT   | ACT   | ACT   | ACT   | ATT   | x x x | x x x | x x x | ACT | ATT | ACT | ATT | ACT | ATT | ACT | TGTATTTGA   |
| 2 (2,7)            | 14c            | AAAAGGATC | ACT | ACT | ACT   | ATT   | ACT   | ACT   | ACT   | x x x | x x x | x x x | ACT | ACT | ACT | ATT | ACT | ATT | ACT | TGTATTTGA   |
| 1 (1,4)            | 14d            | AAAAGGATC | ACT | ACT | ACT   | ACT   | ACT   | ACT   | ACT   | x x x | x x x | x x x | ACT | ATT | ACT | ATT | ACT | ATT | ACT | TGTATTTGA   |
| 4 (5,4)            | 15a            | AAAAGGATC | ACT | ACT | ACT   | ACT   | ACT   | ACT   | ACT   | ACT   | x x x | x x x | ACT | ATT | ACT | ATT | ACT | ATT | ACT | TGTATTTGA   |
| 3 (4,1)            | 15b            | AAAAGGATC | ACT | ACT | ACT   | ACT   | ACT   | ACT   | ACT   | ATT   | x x x | x x x | ACT | ATT | ACT | ATT | ACT | ATT | ACT | TGTATTTGA   |
| 6 (8,1)            | 16a            | AAAAGGATC | ACT | ACT | ACT   | ACT   | ACT   | ACT   | ACT   | ACT   | ACT   | x x x | ACT | ACT | ACT | ATT | ACT | ATT | ACT | TGTATTTGA   |
| 2 (2,7)            | 16b            | AAAAGGATC | ACT | ACT | ACT   | ACT   | ACT   | ACT   | ACT   | ACT   | ACT   | x x x | ACT | ATT | ACT | ATT | ACT | ATT | ACT | TGTATTTGA   |
| 4 (5,4)            | 17a            | AAAAGGATC | ACT | ACT | ACT   | ACT   | ACT   | ACT   | ACT   | ACT   | ACT   | ATT   | ACT | ATT | ACT | ATT | ACT | ATT | ACT | TGTATTTGA   |
| 3 (4,1)            | 17b            | AAAAGGATC | ACT | ACT | ACT   | ACT   | ACT   | ACT   | ACT   | ACT   | ACT   | ACT   | ACT | ATT | ACT | ATT | ACT | ATT | ACT | TGTATTTGA   |
