# Supplementary figures and images for: Molecular Typing of Mycoplasma genitalium-Positive Specimens Discriminates between Persistent and Recurrent Infections in Cases of Treatment Failure and Supports Contact Tracing
Source: MDPI journal article supplement (doi:10.3390/microorganisms7120609), 2019-11-23

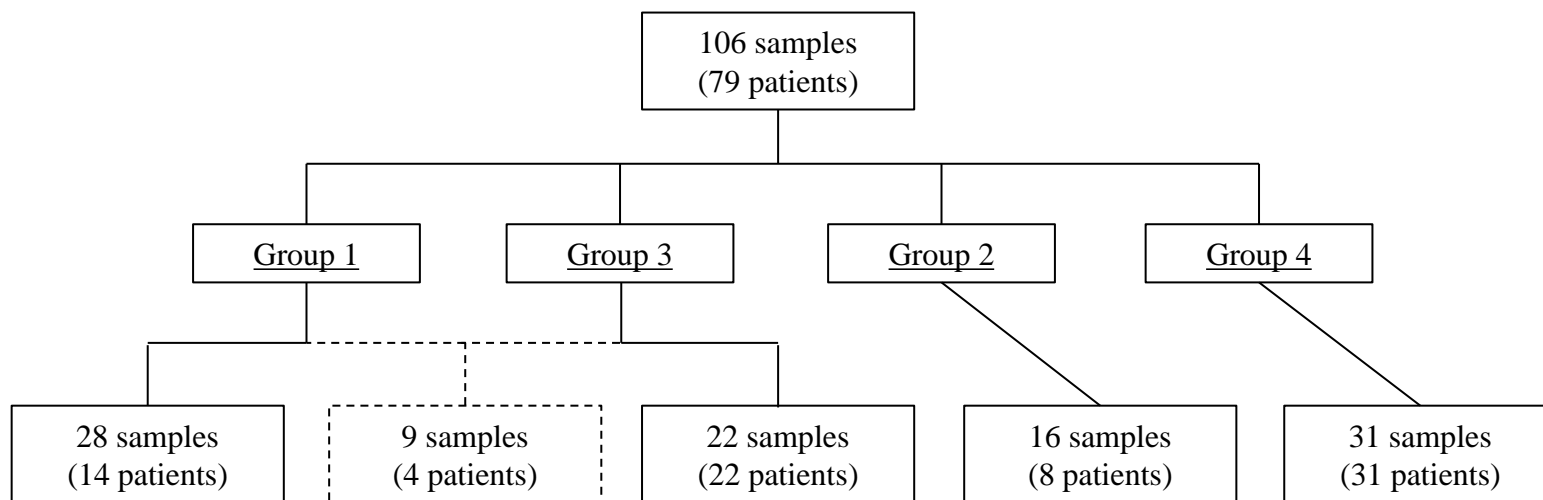

Supplement: s1 [file s1]

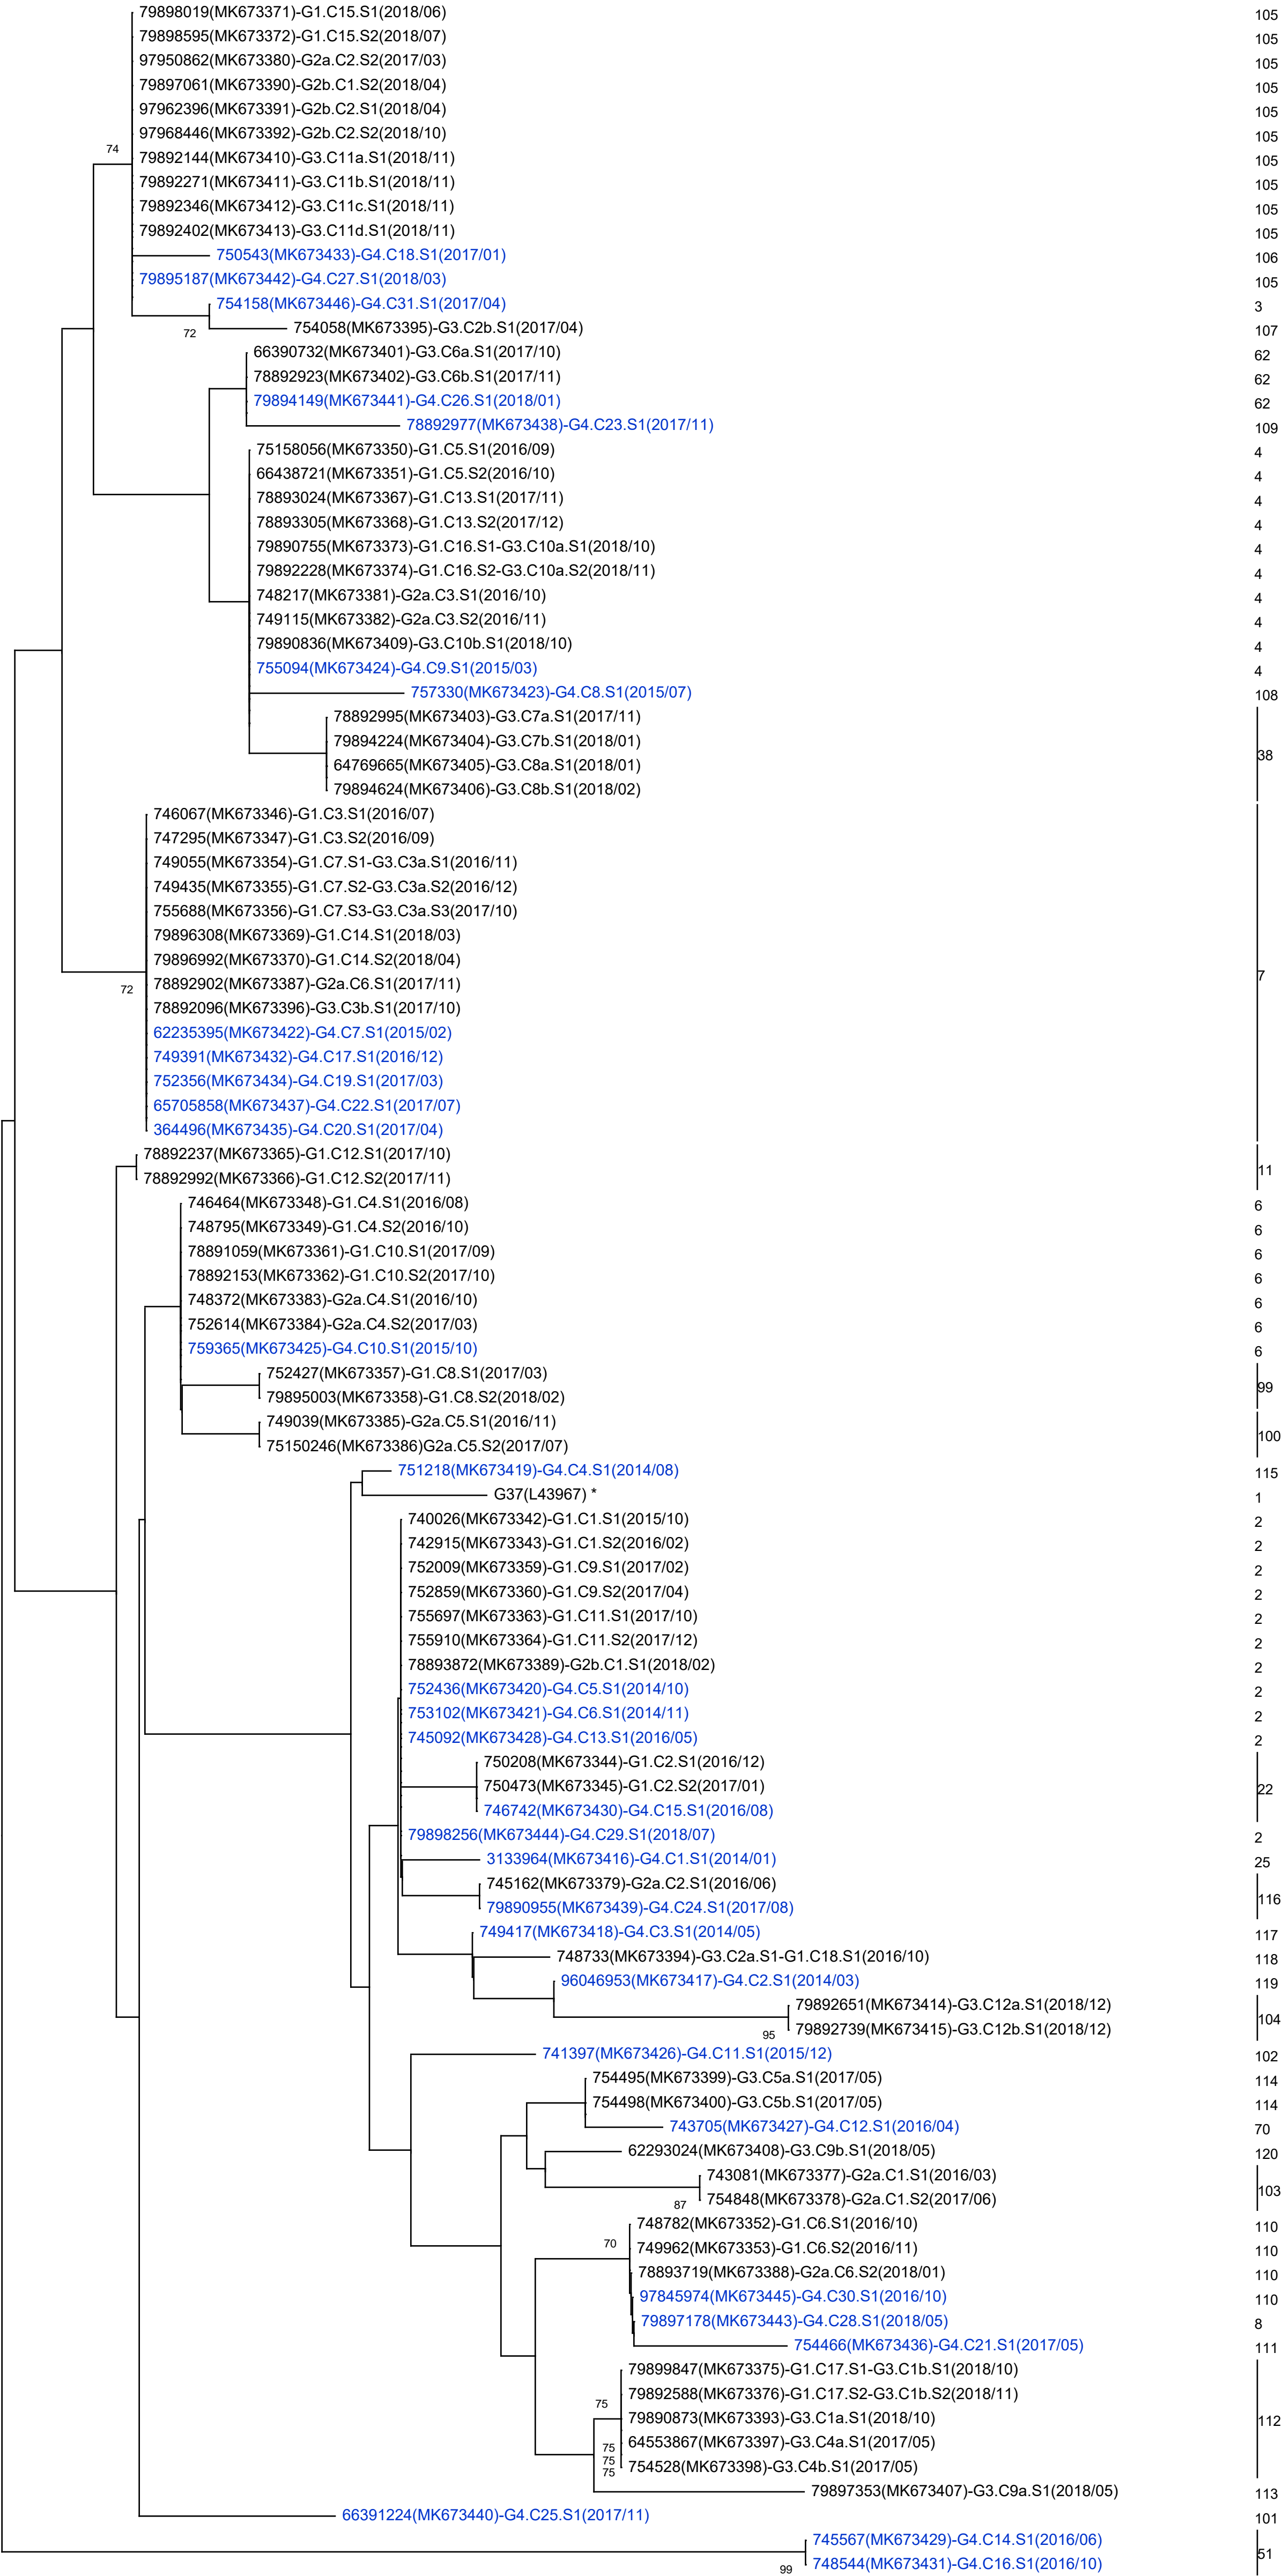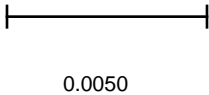

0.0050

Supplement: s1 [file s1]
